# Supplementary material for: Mechanism of functional interaction between potassium channel Kv1.3 and sodium channel NavBeta1 subunit
Source: PubMed Central journal article supplement (PMC5368567; doi:10.1038/srep45310), 2017-03-28
Supplement: srep45310-s1.pdf [file srep45310-s1.pdf]

Supplementary Information for

Mechanism of functional interaction between potassium channel Kv1.3 and sodium channel NavBeta1 subunit

Tomoya Kubota<sup>1</sup>, Ana M. Correa and Francisco Bezanilla.

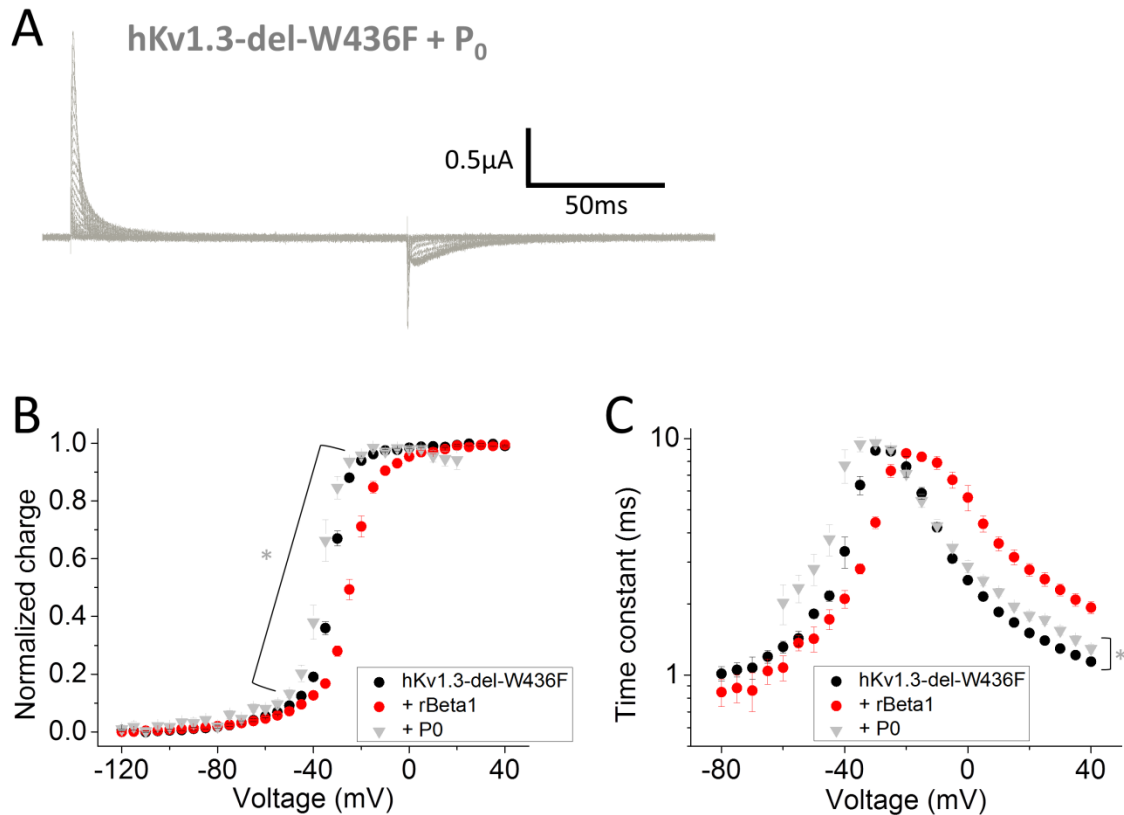

Suppl. Fig 1. Effect of Myelin Basic Protein P<sub>0</sub> on hKv1.3-del-W436F gating currents

**A)** Representative gating currents from hKv1.3-del-W436F co-expressed with P<sub>0</sub>. **B)-C)** The Q-V relationship (**B**) and Tau-V curve (**C**) for hKv1.3-del-W436F alone (black circles, n=8), co-injected with rNavBeta1 (red circles, n=5) or with P<sub>0</sub> (gray inverted triangles, n=4). Error bars indicate SEM. Gray stars (\*) indicate statistical significance (*p*-value < 0.05) of the difference between hKv1.3-del-W436F (black circles) and with P<sub>0</sub> (gray inverted triangles) from -50 mV to -25 mV in Q-V (**B**), and from 0 mV to +40 mV in Tau-V (**C**).

A

```
P22001 Human      MDERLSLLRSPP-PPSARHRAHPPQRPASSG-----GAHTLVNHGYAEPAAAGRE
G3QEG2 Gorilla    MDEHLSLLRSPP-PPSARHRAHPPQRPASSG-----GAHTLVNPGYAEPAAAGRE
F6ZSH4 Macaque     MDEHLSLLRSPP-PPSARHRAHPPQRPASSG-----GAHTLVNPGYAEPAAAGPE
F1S626 Pig        MDEHLSLLRSPPPPPSTRHRAHPPQHHPASRGGGGGGGGGGGDAHTLVNPGYAEPAAAGPE
P15384 Rat         -----
P16390 Mouse      -----
Q90YY3 Xenopus    -----
H2TUB9 Fugu          MDDHLSLLQSPPPSVTKAR-----GDNLVNHGYTDTEA---
```

```
P22001 Human      LPPDMTVVPGDHLLEPEVADG-GGAPPQGGC---GGGGCDRYEPLPPSLPAAGEQDCCG
G3QEG2 Gorilla    LPPNMTVVPGDHMLEPEVADG-GGAPPQGGC---GGGGCDRYEPLPPSLPAAGEQDCCG
F6ZSH4 Macaque     LPPDMTVVPGDHLLEPEVADG-GGAPPQGGC---GGGGCDRYEPLPPSLPAAGEQDCCG
F1S626 Pig        LPPDMTVVPGDHLLEPEAADG-GGDPPQGGCG---GGGGCDRYEPLPPALPAAGEQDCCG
P15384 Rat         ---MTVVPGDHLLEPEAAGGGGGDPPQGGCVSG---GGCDRYEPLPPALPAAGEQDCCG
P16390 Mouse      ---MTVVPGDHLLEPEAAGGGGGDPPQGGCGSGGGGGCDRYEPLPPALPAAGEQDCCG
Q90YY3 Xenopus    ---MTVVACDNILEEAAALPG-----HHSSEAYE-----QEDHECC
H2TUB9 Fugu        --DVMTVVACDNMLEESALPG-----NHSLDRYE-----PDHECC
```

Suppl. Fig 2. KCNA3 N-terminus alignment among species

A) Potential start codons, M1 and M53 in human are highlighted in red. Human, primates, pig and Fugu have longer N-terminus while rodents and *Xenopus* don't.

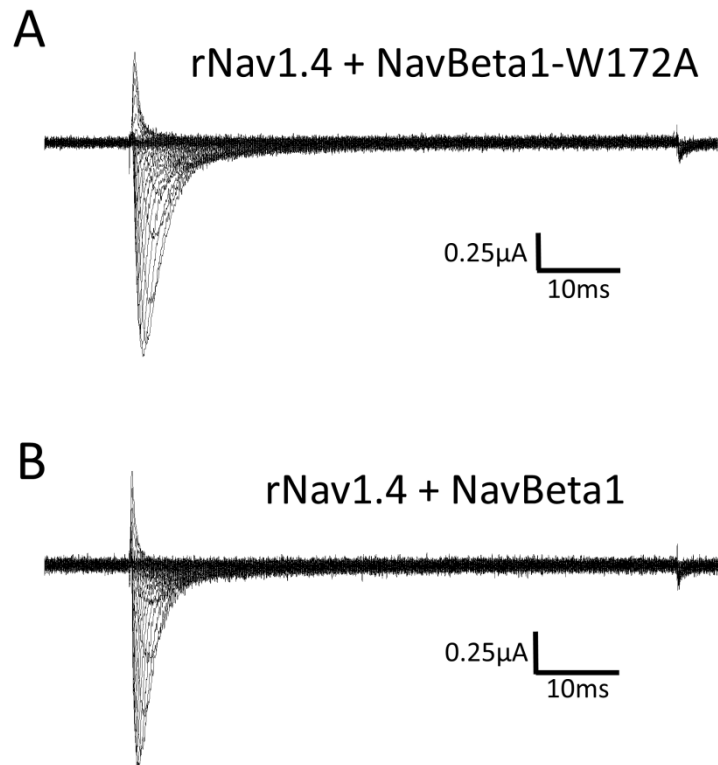

Suppl. Fig 3. W172A effect on Nav ionic currents

Sodium ionic currents from rat skeletal muscle Nav channel (Nav1.4) co-injected with NavBeta1-W172A (**A**) or with NavBeta1 (**B**). NavBeta1-W172A showed acceleration of fast inactivation similar to NavBeta1.
